# Supplementary material
Source: MDPI journal article supplement (https://www.mdpi.com/2306-5729/8/8/126)
Supplement: s1 [file s1]

Table S1. Round-1 performance comparison among models (AlexNet, ResNet-50, MobileNet, and EfficientNet) that were trained on 90% Base and tested on samples with decreasing similarities (Level 1, Inbox, Outbox) for both 2-class and 3-class classifications.

| Round 1             |             | 2 – Classes |       |        | 3 – Classes |       |        |
|---------------------|-------------|-------------|-------|--------|-------------|-------|--------|
| Network             | (%)         | Level 1     | Inbox | Outbox | Level 1     | Inbox | Outbox |
| <b>AlexNet</b>      | Accuracy    | 100         | 98.88 | 58.49  | 99.24       | 83.52 | 47.07  |
|                     | AUC         | 100         | 99.89 | 63.86  | 100         | 100   | 59.63  |
|                     | Specificity | 100         | 99.17 | 60.61  | 98.90       | 76.11 | 32.83  |
|                     | Sensitivity | 100         | 98.28 | 55.16  | 100         | 98.85 | 69.44  |
|                     | Precision   | 100         | 98.28 | 47.12  | 97.62       | 66.67 | 39.68  |
| <b>ResNet – 50</b>  | Accuracy    | 100         | 99.63 | 65.12  | 99.24       | 82.77 | 60.65  |
|                     | AUC         | 100         | 100   | 75.10  | 100         | 99.98 | 84.06  |
|                     | Specificity | 100         | 100   | 73.74  | 98.90       | 74.44 | 43.69  |
|                     | Sensitivity | 100         | 98.85 | 51.59  | 100         | 100   | 87.30  |
|                     | Precision   | 100         | 100   | 55.56  | 97.62       | 65.41 | 49.66  |
| <b>MobileNet</b>    | Accuracy    | 99.24       | 96.63 | 60.19  | 97.73       | 73.40 | 45.8   |
|                     | AUC         | 99.76       | 99.68 | 67.58  | 100         | 99.02 | 70.53  |
|                     | Specificity | 100         | 99.44 | 51.26  | 96.70       | 65.28 | 26.26  |
|                     | Sensitivity | 97.56       | 90.80 | 74.21  | 100         | 90.23 | 76.59  |
|                     | Precision   | 100         | 98.75 | 49.21  | 93.18       | 55.67 | 39.79  |
| <b>EfficientNet</b> | Accuracy    | 96.97       | 91.20 | 61.27  | 90.15       | 70.22 | 41.98  |
|                     | AUC         | 100         | 95.98 | 67.12  | 99.57       | 96.12 | 66.38  |
|                     | Specificity | 100         | 97.22 | 61.87  | 89.01       | 63.06 | 29.55  |
|                     | Sensitivity | 90.24       | 78.74 | 60.32  | 92.68       | 85.06 | 61.51  |
|                     | Precision   | 100         | 93.20 | 50.17  | 79.17       | 52.67 | 35.71  |

Table S2. Round-2 performance comparison among models (AlexNet, ResNet-50, MobileNet, and EfficientNet) that were trained on (90% Base plus Th1, Th2) and tested on samples with decreasing similarities (Level 1, Inbox, Outbox) for both 2-class and 3-class classifications.

| Round 2             |             | 2 – Classes |       |        | 3 – Classes |       |        |
|---------------------|-------------|-------------|-------|--------|-------------|-------|--------|
| Network             | (%)         | Level 1     | Inbox | Outbox | Level 1     | Inbox | Outbox |
| <b>AlexNet</b>      | Accuracy    | 98.60       | 98.69 | 68.06  | 99.30       | 80.15 | 54.01  |
|                     | AUC         | 99.98       | 99.94 | 79.55  | 100         | 99.97 | 78.42  |
|                     | Specificity | 98.90       | 99.17 | 61.36  | 98.90       | 71.67 | 35.10  |
|                     | Sensitivity | 98.08       | 97.70 | 78.57  | 100         | 97.70 | 83.73  |
|                     | Precision   | 98.08       | 98.27 | 56.41  | 98.11       | 62.50 | 45.09  |
| <b>ResNet – 50</b>  | Accuracy    | 99.30       | 99.44 | 65.90  | 100         | 91.01 | 58.18  |
|                     | AUC         | 100         | 99.99 | 84.50  | 100         | 99.99 | 82.13  |
|                     | Specificity | 98.90       | 100   | 53.54  | 100         | 86.67 | 44.70  |
|                     | Sensitivity | 100         | 98.28 | 85.32  | 100         | 100   | 79.37  |
|                     | Precision   | 98.11       | 100   | 53.88  | 100         | 78.38 | 47.73  |
| <b>MobileNet</b>    | Accuracy    | 97.90       | 95.88 | 71.14  | 95.10       | 77.34 | 54.48  |
|                     | AUC         | 99.89       | 99.33 | 83.96  | 100         | 99.40 | 79.35  |
|                     | Specificity | 98.90       | 99.44 | 62.12  | 92.31       | 68.33 | 36.11  |
|                     | Sensitivity | 96.15       | 88.51 | 85.32  | 100         | 95.98 | 83.33  |
|                     | Precision   | 98.04       | 98.72 | 58.90  | 88.14       | 59.43 | 45.36  |
| <b>EfficientNet</b> | Accuracy    | 97.90       | 93.07 | 61.88  | 93.0        | 68.73 | 56.33  |
|                     | AUC         | 99.87       | 98.19 | 71.12  | 99.81       | 97.06 | 77.21  |
|                     | Specificity | 97.80       | 96.94 | 58.08  | 91.21       | 61.39 | 48.48  |
|                     | Sensitivity | 98.81       | 85.06 | 67.86  | 96.15       | 83.91 | 68.65  |
|                     | Precision   | 96.23       | 93.08 | 50.74  | 86.21       | 51.23 | 45.89  |

Table S3. Round-3A performance comparison among models (AlexNet, ResNet-50, MobileNet, and EfficientNet) that were trained on (90% Base, Th1,2, and 25% Outbox) and tested on samples with decreasing similarities (Level 1, Inbox, Outbox) for both 2-class and 3-class classifications.

| Round 3A            |             | 2 – Classes |       |        | 3 – Classes |       |        |
|---------------------|-------------|-------------|-------|--------|-------------|-------|--------|
| Network             | (%)         | Level 1     | Inbox | Outbox | Level 1     | Inbox | Outbox |
| <b>AlexNet</b>      | Accuracy    | 98.73       | 98.13 | 97.38  | 98.09       | 85.77 | 93.06  |
|                     | AUC         | 99.95       | 99.96 | 99.61  | 98.90       | 99.97 | 98.84  |
|                     | Specificity | 100         | 100   | 98.48  | 98.99       | 80.56 | 91.67  |
|                     | Sensitivity | 96.55       | 94.25 | 95.63  | 96.55       | 96.55 | 95.24  |
|                     | Precision   | 100         | 100   | 97.57  | 98.25       | 70.59 | 87.91  |
| <b>ResNet – 50</b>  | Accuracy    | 99.36       | 99.63 | 97.84  | 97.45       | 84.83 | 95.06  |
|                     | AUC         | 99.69       | 100.  | 99.51  | 99.95       | 99.96 | 98.69  |
|                     | Specificity | 100         | 100   | 100    | 96.97       | 78.33 | 96.21  |
|                     | Sensitivity | 98.28       | 98.85 | 94.44  | 98.28       | 98.28 | 93.25  |
|                     | Precision   | 100         | 100   | 100    | 95.00       | 68.67 | 94.00  |
| <b>MobileNet</b>    | Accuracy    | 98.10       | 97.57 | 94.14  | 94.27       | 78.28 | 87.35  |
|                     | AUC         | 99.81       | 99.57 | 98.61  | 99.53       | 99.49 | 98.59  |
|                     | Specificity | 100         | 99.72 | 94.70  | 94.95       | 71.39 | 83.84  |
|                     | Sensitivity | 83          | 93.10 | 93.25  | 93.10       | 92.53 | 92.86  |
|                     | Precision   | 100         | 99.39 | 91.80  | 91.53       | 60.98 | 78.52  |
| <b>EfficientNet</b> | Accuracy    | 93.63       | 90.64 | 87.50  | 84.18       | 68.73 | 80.09  |
|                     | AUC         | 98.87       | 96.16 | 95.39  | 99.37       | 97.61 | 95.99  |
|                     | Specificity | 93.94       | 95.28 | 84.85  | 83.84       | 61.67 | 80.05  |
|                     | Sensitivity | 93.10       | 81.03 | 91.67  | 84.48       | 83.33 | 80.16  |
|                     | Precision   | 90.00       | 89.24 | 79.38  | 75.39       | 51.24 | 71.89  |

Table 4. Round-3B performance comparison among models (AlexNet, ResNet-50, MobileNet, and EfficientNet) that were trained on (90% Base, Th1,2, and 50% Outbox) and tested on samples with decreasing similarities (Level 1, Inbox, Outbox) for both 2-class and 3-class classifications.

| Round 3B            |             | 2 – Classes |       |        | 3 – Classes |       |        |
|---------------------|-------------|-------------|-------|--------|-------------|-------|--------|
| Network             | (%)         | Level 1     | Inbox | Outbox | Level 1     | Inbox | Outbox |
| <b>AlexNet</b>      | Accuracy    | 99.36       | 97.75 | 99.07  | 92.99       | 78.46 | 94.14  |
|                     | AUC         | 99.97       | 99.98 | 99.88  | 99.13       | 99.87 | 99.48  |
|                     | Specificity | 100         | 100   | 99.49  | 89.90       | 71.11 | 91.92  |
|                     | Sensitivity | 98.28       | 93.10 | 98.41  | 98.28       | 93.68 | 97.62  |
|                     | Precision   | 100         | 100   | 99.20  | 85.07       | 61.05 | 88.49  |
| <b>ResNet – 50</b>  | Accuracy    | 100         | 97.94 | 99.85  | 99.36       | 88.20 | 97.38  |
|                     | AUC         | 100         | 99.97 | 100    | 100         | 99.99 | 99.98  |
|                     | Specificity | 100         | 100   | 100    | 98.99       | 83.28 | 95.96  |
|                     | Sensitivity | 100         | 93.68 | 99.60  | 100         | 98.28 | 99.60  |
|                     | Precision   | 100         | 100   | 100    | 98.31       | 74.03 | 94.01  |
| <b>MobileNet</b>    | Accuracy    | 98.73       | 95.69 | 98.15  | 99.24       | 76.78 | 95.06  |
|                     | AUC         | 99.81       | 99.36 | 99.75  | 99.76       | 97.81 | 99.91  |
|                     | Specificity | 98.99       | 98.61 | 98.23  | 100         | 72.22 | 93.18  |
|                     | Sensitivity | 98.28       | 89.66 | 98.02  | 97.56       | 86.21 | 98.02  |
|                     | Precision   | 98.28       | 96.89 | 97.24  | 100         | 60.00 | 90.15  |
| <b>EfficientNet</b> | Accuracy    | 96.18       | 91.76 | 95.68  | 89.81       | 68.35 | 90.28  |
|                     | AUC         | 99.41       | 95.48 | 99.22  | 99.10       | 96.08 | 99.39  |
|                     | Specificity | 97.98       | 96.67 | 96.97  | 86.87       | 60.56 | 87.63  |
|                     | Sensitivity | 93.10       | 81.61 | 93.65  | 94.83       | 84.48 | 94.44  |
|                     | Precision   | 96.43       | 92.21 | 95.16  | 80.88       | 50.87 | 82.93  |

Table 5. Round-3C performance comparison among models (AlexNet, ResNet-50, MobileNet, and EfficientNet) that were trained on (90% Base, Th1,2, and 75% Outbox) and tested on samples with decreasing similarities (Level 1, Inbox, Outbox) for both 2-class and 3-class classifications.

| Round 3C            |             | 2 – Classes |       |        | 3 – Classes |       |        |
|---------------------|-------------|-------------|-------|--------|-------------|-------|--------|
| Network             | (%)         | Level 1     | Inbox | Outbox | Level 1     | Inbox | Outbox |
| <b>AlexNet</b>      | Accuracy    | 99.36       | 98.50 | 99.69  | 100         | 87.27 | 98.46  |
|                     | AUC         | 100         | 99.96 | 100    | 100         | 99.97 | 100    |
|                     | Specificity | 100         | 99.72 | 99.49  | 100         | 82.22 | 97.73  |
|                     | Sensitivity | 98.28       | 95.98 | 100    | 100         | 97.70 | 99.60  |
|                     | Precision   | 100         | 99.40 | 99.21  | 100         | 72.65 | 96.54  |
| <b>ResNet – 50</b>  | Accuracy    | 99.36       | 98.69 | 98.77  | 98.73       | 84.46 | 98.92  |
|                     | AUC         | 100         | 100   | 99.97  | 100         | 99.99 | 100    |
|                     | Specificity | 100         | 100   | 99.24  | 97.98       | 79.44 | 98.23  |
|                     | Sensitivity | 98.28       | 95.98 | 98.02  | 100         | 94.83 | 100    |
|                     | Precision   | 100         | 100   | 98.80  | 96.67       | 69.04 | 97.30  |
| <b>MobileNet</b>    | Accuracy    | 100         | 95.51 | 98.30  | 96.18       | 75.09 | 96.91  |
|                     | AUC         | 100         | 99.19 | 99.91  | 100         | 99.64 | 99.96  |
|                     | Specificity | 100         | 98.89 | 98.23  | 93.94       | 67.78 | 95.45  |
|                     | Sensitivity | 100         | 88.51 | 98.41  | 100         | 90.23 | 99.21  |
|                     | Precision   | 100         | 97.47 | 97.25  | 90.63       | 57.51 | 93.28  |
| <b>EfficientNet</b> | Accuracy    | 98.10       | 89.14 | 97.99  | 89.10       | 65.92 | 95.06  |
|                     | AUC         | 99.55       | 95.81 | 99.93  | 99.91       | 95.05 | 99.94  |
|                     | Specificity | 98.99       | 97.22 | 97.98  | 85.86       | 59.17 | 92.68  |
|                     | Sensitivity | 96.55       | 72.41 | 98.02  | 96.52       | 79.89 | 98.81  |
|                     | Precision   | 98.25       | 92.65 | 96.86  | 80          | 48.60 | 89.57  |
